# Supplementary material
Source: PubMed Central journal article supplement (PMC6953732)
Supplement: NIHMS1531036-supplement-1.pdf [file NIHMS1531036-supplement-1.pdf]

Table S1  
Descriptive Statistics and Zero-order Correlations between Study Variables

|     | Demographics and Covariates |                  |                         |                         |                            |                         | T1 Tech Use              |                   |                    | T1 Mental Health        |                                |                       | Daily Tech Use       |                            |                |                          | Daily Mental Health        |                            |                           |                       |                               |             |                |           |
|-----|-----------------------------|------------------|-------------------------|-------------------------|----------------------------|-------------------------|--------------------------|-------------------|--------------------|-------------------------|--------------------------------|-----------------------|----------------------|----------------------------|----------------|--------------------------|----------------------------|----------------------------|---------------------------|-----------------------|-------------------------------|-------------|----------------|-----------|
|     | 1. Age at EMA               | 2. Female Gender | 3. White Race/Ethnicity | 4. Black Race/Ethnicity | 5. Hispanic Race/Ethnicity | 6. Other Race/Ethnicity | 7. Economic Disadvantage | 8. School Absence | 9. Phone Ownership | 10. Social Media Access | 11. Social Media Use Frequency | 12. Effortful Control | 13. Conduct Problems | 14. Psychological Distress | 15. Texts Sent | 16. Tech for School Work | 17. Tech for Communication | 18. Tech for Entertainment | 19. Tech Creating Content | 20. Total Screen Time | 21. Inattention/Hyperactivity | 22. Conduct | 23. Depression | 24. Worry |
| 1.  |                             | -.05             | -.06                    | .05                     | .05                        | -.02                    | .09                      | .04               | .32*               | .27*                    | .28*                           | -.05                  | .11*                 | -.08                       | .08            | .14*                     | .23*                       | .08                        | .03                       | .19*                  | .06                           | .05         | .02            | .09       |
| 2.  |                             |                  | -.11*                   | .08                     | .09                        | -.04                    | .05                      | .08               | .07*               | .14*                    | .16*                           | .08                   | -.12*                | <.01                       | -.05           | <.01                     | .09                        | -.04                       | <.01                      | .04                   | .05                           | -.09        | .24*           | .21*      |
| 3.  |                             |                  |                         | -.59*                   | -.47*                      | -.37*                   | -.35*                    | -.03              | -.11*              | -.06                    | -.08                           | .13*                  | -.12*                | .05                        | -.07           | -.20*                    | -.18*                      | -.12*                      | -.15*                     | -.22*                 | <.01                          | -.09        | .08            | .05       |
| 4.  |                             |                  |                         |                         | -.19*                      | -.15*                   | .25*                     | <.01              | .14*               | .04                     | .04                            | -.07                  | .15*                 | -.02                       | .02*           | .19*                     | .21*                       | .14*                       | .19*                      | .25*                  | .06                           | .15*        | -.01           | <.01      |
| 5.  |                             |                  |                         |                         |                            | -.12*                   | .17*                     | .02               | <.01               | .09                     | .07                            | -.03                  | .01                  | .02                        | .01            | .05                      | .01                        | .02                        | -.01                      | .01                   | -.08                          | -.03        | -.05           | -.01      |
| 6.  |                             |                  |                         |                         |                            |                         | .06                      | .04               | -.01               | -.05                    | <.01                           | -.10*                 | -.01                 | -.08                       | .08            | .02                      | .01                        | <.01                       | .01                       | .01                   | <.01                          | -.01        | -.08           | -.08      |
| 7.  |                             |                  |                         |                         |                            |                         |                          | -.06              | .04                | .07                     | .07                            | -.27*                 | .14*                 | -.17*                      | .08            | .20*                     | .16*                       | .08                        | .23*                      | .19*                  | .02                           | .09         | .06            | .07       |
| 8.  |                             |                  |                         |                         |                            |                         |                          |                   | .06                | .03                     | .02                            | .06                   | .03                  | .03                        | -.04           | -.24*                    | .06                        | .16*                       | -.05                      | <.01                  | -.08                          | -.01        | -.07           | -.12*     |
| 9.  |                             |                  |                         |                         |                            |                         |                          |                   |                    | .35*                    | .38*                           | -.03                  | .07                  | -.02                       | .13            | .04                      | .17*                       | .11*                       | .11*                      | .15*                  | .02                           | .02         | .04            | .07       |
| 10. |                             |                  |                         |                         |                            |                         |                          |                   |                    |                         | .83*                           | -.05                  | .21*                 | -.08                       | .09            | .07                      | .22*                       | .08                        | .15*                      | .18*                  | .02                           | .10*        | .08            | .05       |
| 11. |                             |                  |                         |                         |                            |                         |                          |                   |                    |                         |                                | -.08                  | .24*                 | -.06                       | .16*           | .11*                     | .25*                       | .05                        | .19*                      | .20*                  | .02                           | .09         | .11            | .08       |
| 12. |                             |                  |                         |                         |                            |                         |                          |                   |                    |                         |                                |                       | -.33*                | .36*                       | -.05           | -.11*                    | -.15*                      | -.13*                      | -.14*                     | -.17*                 | -.24*                         | -.21*       | -.17*          | -.17*     |
| 13. |                             |                  |                         |                         |                            |                         |                          |                   |                    |                         |                                |                       |                      | -.22*                      | .09            | .05                      | .26*                       | .12*                       | .18*                      | .23*                  | .20*                          | .24*        | .08            | .07       |
| 14. |                             |                  |                         |                         |                            |                         |                          |                   |                    |                         |                                |                       |                      |                            | .02            | -.09                     | -.10*                      | -.12*                      | -.10                      | -.14*                 | -.26*                         | -.14*       | -.12*          | -.12*     |
| 15. |                             |                  |                         |                         |                            |                         |                          |                   |                    |                         |                                |                       |                      |                            |                | .17*                     | .36*                       | .16*                       | .26*                      | .34*                  | -.02                          | .03         | -.08           | -.04      |
| 16. |                             |                  |                         |                         |                            |                         |                          |                   |                    |                         |                                |                       |                      |                            |                |                          | .26*                       | .21*                       | .36*                      | .56*                  | .18*                          | .28*        | .16*           | .16*      |
| 17. |                             |                  |                         |                         |                            |                         |                          |                   |                    |                         |                                |                       |                      |                            |                |                          |                            | .37*                       | .43*                      | .80*                  | .18*                          | .24*        | .11*           | .13*      |
| 18. |                             |                  |                         |                         |                            |                         |                          |                   |                    |                         |                                |                       |                      |                            |                |                          |                            |                            | .40*                      | .74*                  | .08                           | .13*        | <.01           | .04       |
| 19. |                             |                  |                         |                         |                            |                         |                          |                   |                    |                         |                                |                       |                      |                            |                |                          |                            |                            |                           | .66*                  | .16*                          | .26*        | .06            | .08       |
| 20. |                             |                  |                         |                         |                            |                         |                          |                   |                    |                         |                                |                       |                      |                            |                |                          |                            |                            |                           |                       | .20*                          | .29*        | .10*           | .14*      |
| 21. |                             |                  |                         |                         |                            |                         |                          |                   |                    |                         |                                |                       |                      |                            |                |                          |                            |                            |                           |                       |                               | .53*        | .62*           | .66*      |
| 22. |                             |                  |                         |                         |                            |                         |                          |                   |                    |                         |                                |                       |                      |                            |                |                          |                            |                            |                           |                       |                               |             | .29*           | .36*      |
| 23. |                             |                  |                         |                         |                            |                         |                          |                   |                    |                         |                                |                       |                      |                            |                |                          |                            |                            |                           |                       |                               |             |                | .73*      |
| N   | 388                         | 388              | 388                     | 388                     | 388                        | 388                     | 383                      | 381               | 388                | 388                     | 384                            | 388                   | 388                  | 388                        | 382            | 382                      | 379                        | 380                        | 381                       | 382                   | 386                           | 387         | 388            | 388       |
| M   | 13.37                       | 49.74            | 59.79                   | 19.07                   | 12.89                      | 6.44                    | 31.07                    | .58               | .64                | .65                     | 2.71                           | 3.73                  | .13                  | 4.17                       | 46.88          | .79                      | 1.34                       | 1.83                       | .38                       | 4.18                  | .82                           | .08         | 21.34          | 18.32     |
| SD  | 1.14                        |                  |                         |                         |                            |                         |                          | .31               |                    |                         | 2.42                           | .60                   | .21                  | .61                        | 160.3          | 1.17                     | 1.99                       | 1.72                       | .69                       | 3.85                  | .88                           | .17         | 12.46          | 17.13     |
| SK  | 0.17                        |                  |                         |                         |                            |                         |                          | .28               |                    |                         | .10                            | -.25                  | 2.66                 | -.85                       | 8.47           | 4.61                     | 5.18                       | 1.98                       | 3.07                      | 2.28                  | 1.10                          | 3.12        | .89            | 1.10      |
| K   | -.022                       |                  |                         |                         |                            |                         |                          | -.136             |                    |                         | -.163                          | -.046                 | 8.58                 | .33                        | 88.36          | 35.88                    | 47.11                      | 5.80                       | 12.63                     | 7.64                  | .17                           | 10.34       | .79            | .75       |

Note. Total N=388. Table presents correlations, number of participants with present data (N), means (M), standard deviations (SD), skew (SK), and Kurtosis (K) at the person level (averaged across the study period). M for categorical demographic variables is the percent of sample who identify as a member of the demographic category. \*= $p \leq .05$

Table S2

*Multilevel Models of Daily Associations between Technology and Mental Health Symptoms: Curvilinear Effects (Question 3)*

|                       | Conduct     |            |                       |             |                 | Inattention/Hyperactivity |                |                       |             |                 | Depression     |                |                     |             |                 | Worry       |            |                      |             |            |
|-----------------------|-------------|------------|-----------------------|-------------|-----------------|---------------------------|----------------|-----------------------|-------------|-----------------|----------------|----------------|---------------------|-------------|-----------------|-------------|------------|----------------------|-------------|------------|
|                       | <i>b</i>    | <i>SE</i>  | <i>CI</i>             | <i>OR</i>   | <i>p</i>        | <i>b</i>                  | <i>SE</i>      | <i>CI</i>             | <i>IRR</i>  | <i>p</i>        | <i>b</i>       | <i>SE</i>      | <i>CI</i>           | $\beta$     | <i>p</i>        | <i>b</i>    | <i>SE</i>  | <i>CI</i>            | $\beta$     | <i>p</i>   |
| Texts Sent (in 100s)  |             |            |                       |             |                 |                           |                |                       |             |                 |                |                |                     |             |                 |             |            |                      |             |            |
| Daily Linear          | .02         | .13        | -.24, .29             | 1.02        | .86             | -.04                      | .02            | -.09, <.01            | .96         | .08             | .57            | .47            | -.35, 1.48          | .12         | .23             | .58         | .46        | -.32, 1.47           | .08         | .21        |
| Daily Quadratic       | >-.01       | <.01       | -.01, <.01            | 1.00        | .69             | <.01                      | <.01           | <.01, <.01            | 1.00        | .12             | -.01           | .01            | -.03, .01           | -.07        | .25             | -.02        | .01        | -.04, <.01           | -.07        | .08        |
| Person-m Linear       | <b>.58</b>  | <b>.23</b> | <b>.13, 1.03</b>      | <b>1.79</b> | <b>.01</b>      | .10                       | .09            | -.08, .28             | 1.11        | .26             | -.77           | .65            | -2.04, .51          | -.10        | .24             | .69         | .99        | -1.25, 2.63          | .07         | .48        |
| Person-m Quadratic    | <b>-.06</b> | <b>.02</b> | <b>-.10, -.01</b>     | <b>.94</b>  | <b>.01</b>      | -.01                      | .01            | -.03, .01             | .99         | .22             | >-.01          | .04            | -.08, .08           | -.01        | .92             | -.09        | .06        | -.20, .03            | -.13        | .14        |
| Tech School Work      |             |            |                       |             |                 |                           |                |                       |             |                 |                |                |                     |             |                 |             |            |                      |             |            |
| Daily Linear          | <b>.23</b>  | <b>.11</b> | <b>.01, .44</b>       | <b>1.26</b> | <b>.04</b>      | <b>.07</b>                | <b>.02</b>     | <b>.03, .12</b>       | <b>1.08</b> | <b>&lt;.01*</b> | -.13           | .23            | -.58, .33           | -.02        | .58             | <b>.82</b>  | <b>.37</b> | <b>.09, 1.54</b>     | <b>.09</b>  | <b>.03</b> |
| Daily Quadratic       | <b>-.02</b> | <b>.01</b> | <b>-.03, &gt;-.01</b> | <b>.98</b>  | <b>.02</b>      | <b>-.01</b>               | <b>&lt;.01</b> | <b>-.01, &gt;-.01</b> | <b>1.00</b> | <b>&lt;.01*</b> | .02            | .02            | -.03, .07           | .04         | .40             | -.04        | .03        | -.09, .01            | -.05        | .15        |
| Person-m Linear       | .42         | .22        | -.02, .86             | 1.52        | .06             | <b>.20</b>                | <b>.09</b>     | .02, .39              | 1.23        | <b>.03</b>      | 1.71           | .95            | -.14, 3.57          | .17         | .07             | 1.36        | 1.25       | -1.09, 3.81          | .10         | .28        |
| Person-m Quadratic    | -.04        | .03        | -.09, .01             | .96         | .11             | >-.01                     | .01            | -.02, .01             | 1.00        | .69             | -.01           | .11            | -.22, .21           | >-.01       | .96             | .03         | .03        | -.24, .31            | .02         | .81        |
| Tech Communication    |             |            |                       |             |                 |                           |                |                       |             |                 |                |                |                     |             |                 |             |            |                      |             |            |
| Daily Linear          | .15         | .10        | -.04, .34             | 1.17        | .11             | >-.01                     | .02            | -.04, .04             | 1.00        | .97             | -.34           | .30            | -.93, .25           | -.08        | .25             | .32         | .31        | -.29, .93            | .05         | .30        |
| Daily Quadratic       | -.01        | <.01       | -.02, <.01            | .99         | .16             | <.01                      | <.01           | >-.01, <.01           | 1.00        | .93             | .01            | .02            | -.02, .04           | .03         | .60             | <b>-.03</b> | <b>.01</b> | <b>-.06, &lt;.01</b> | <b>-.06</b> | <b>.05</b> |
| Person-m Linear       | .28         | .18        | -.07, .62             | 1.32        | .11             | <b>.17</b>                | <b>.08</b>     | .01, .34              | 1.19        | <b>.04</b>      | .93            | .71            | -.47, 2.33          | .13         | .19             | .45         | .96        | -1.44, 2.33          | .04         | .64        |
| Person-m Quadratic    | -.03        | .03        | -.09, .02             | .97         | .24             | -.02                      | .02            | -.06, .02             | .98         | .28             | -.11           | .10            | -.31, .09           | -.07        | .28             | -.08        | .13        | -.33, .17            | -.04        | .53        |
| Tech Entertainment    |             |            |                       |             |                 |                           |                |                       |             |                 |                |                |                     |             |                 |             |            |                      |             |            |
| Daily Linear          | .03         | .10        | -.17, .23             | 1.03        | .78             | -.02                      | .02            | -.06, .02             | -.42        | .33             | -.29           | .20            | -.68, .10           | -.08        | .14             | -.02        | .30        | -.62, .57            | >-.01       | .94        |
| Daily Quadratic       | >-.01       | <.01       | -.01, .01             | .10         | .80             | <.01                      | <.01           | >-.01, <.01           | .07         | .83             | .01            | .01            | -.01, .04           | .06         | .27             | -.01        | .01        | -.03, .02            | -.02        | .69        |
| Person-m Linear       | .12         | .14        | -.16, .40             | 1.13        | .40             | .13                       | .07            | -.01, .26             | .16         | .06             | .49            | .52            | -.53, 1.52          | .07         | .34             | .31         | .79        | -1.23, 1.86          | .03         | .69        |
| Person-m Quadratic    | .01         | .03        | -.05, .06             | 1.01        | .81             | -.01                      | .02            | -.03, .02             | -.03        | .73             | -.06           | .11            | -.28, .16           | -.04        | .59             | .04         | .17        | -.30, .37            | .02         | .83        |
| Tech Creating Content |             |            |                       |             |                 |                           |                |                       |             |                 |                |                |                     |             |                 |             |            |                      |             |            |
| Daily Linear          | <b>.78</b>  | <b>.21</b> | <b>.36, 1.20</b>      | <b>2.19</b> | <b>&lt;.01*</b> | .04                       | .04            | -.03, .11             | 1.04        | .25             | <b>-1.11</b>   | <b>.38</b>     | <b>-1.86, -.37</b>  | <b>-.12</b> | <b>&lt;.01*</b> | .03         | .66        | -1.26, 1.32          | <.01        | .96        |
| Daily Quadratic       | <b>-.11</b> | <b>.03</b> | <b>-.18, -.04</b>     | <b>.90</b>  | <b>&lt;.01*</b> | >-.01                     | <.01           | -.01, <.01            | 1.00        | .25             | <b>.08</b>     | <b>.02</b>     | <b>.03, .12</b>     | <b>.09</b>  | <b>&lt;.01*</b> | <.01        | .04        | -.07, .07            | <.01        | .94        |
| Person-m Linear       | <b>1.19</b> | <b>.40</b> | <b>.42, 1.97</b>      | <b>3.30</b> | <b>&lt;.01*</b> | <b>.80</b>                | <b>.17</b>     | <b>.47, 1.14</b>      | <b>2.23</b> | <b>&lt;.01*</b> | <b>6.30</b>    | <b>1.59</b>    | <b>3.18, 9.41</b>   | <b>.34</b>  | <b>&lt;.01*</b> | 3.17        | 2.26       | -1.27, 7.60          | .13         | .16        |
| Person-m Quadratic    | <b>-.39</b> | <b>.13</b> | <b>-.64, -.14</b>     | <b>.68</b>  | <b>&lt;.01*</b> | <b>-.23</b>               | <b>.06</b>     | <b>-.36, -.11</b>     | <b>.80</b>  | <b>&lt;.01*</b> | <b>-2.00</b>   | <b>.47</b>     | <b>-2.91, -1.08</b> | <b>-.28</b> | <b>&lt;.01*</b> | -.87        | .65        | -2.15, .41           | -.10        | .18        |
| Total Screen Time     |             |            |                       |             |                 |                           |                |                       |             |                 |                |                |                     |             |                 |             |            |                      |             |            |
| Daily Linear          | .04         | .03        | -.023, .10            | 1.04        | .22             | <.01                      | .01            | -.02, .03             | .15         | .81             | <b>-.22</b>    | <b>.08</b>     | -.37, -.07          | -.12        | <b>.01</b>      | .03         | .12        | -.19, .26            | .01         | .79        |
| Daily Quadratic       | <.01        | <.01       | >-.01, <.01           | 1.00        | .60             | <.01                      | <.01           | >-.01, <.01           | -.43        | .56             | <b>&lt;.01</b> | <b>&lt;.01</b> | <.01, .01           | .08         | <b>.01</b>      | >-.01       | <.01       | -.05, <.01           | -.02        | .39        |
| Person-m Linear       | <b>.16</b>  | .06        | .03, .28              | 1.17        | <b>.02</b>      | .08                       | .05            | -.01, .17             | .22         | .08             | <b>.55</b>     | <b>.25</b>     | .06, 1.04           | .17         | <b>.03</b>      | .41         | .37        | -.32, 1.13           | .09         | .28        |
| Person-m Quadratic    | -.01        | <.01       | -.02, <.01            | .99         | .08             | >-.01                     | .01            | -.01, .01             | -.06        | .76             | -.02           | .02            | -.07, .02           | -.08        | .29             | -.01        | .03        | -.07, .04            | -.04        | .62        |

*Note.* Associations between each type of technology use and each mental health domain are tested in separate multilevel models alongside daily and person-level quadratic terms, and covariates of daily school attendance and person-level mean school attendance, age, gender, economic disadvantage, and dummy coded race/ethnicity. Significant ( $p \leq .05$ ) relations bolded. Coefficients which met FDR-corrected significance marked with an asterisk. Raw regression coefficients (standard errors) reported.

Table S3

*Multilevel Interactions between Age and Daily Technology Use for Daily Mental Health Symptoms (Question 4)*

|                       | Conduct     |             |                     |             |                | Inattention/Hyperactivity |            |                       |            |            | Depression  |            |                    |             |            | Worry       |            |                      |             |            |
|-----------------------|-------------|-------------|---------------------|-------------|----------------|---------------------------|------------|-----------------------|------------|------------|-------------|------------|--------------------|-------------|------------|-------------|------------|----------------------|-------------|------------|
|                       | <i>b</i>    | <i>SE</i>   | <i>CI</i>           | <i>OR</i>   | <i>p</i>       | <i>b</i>                  | <i>SE</i>  | <i>CI</i>             | <i>IRR</i> | <i>p</i>   | <i>b</i>    | <i>SE</i>  | <i>CI</i>          | $\beta$     | <i>p</i>   | <i>b</i>    | <i>SE</i>  | <i>CI</i>            | $\beta$     | <i>p</i>   |
| Texts Sent (in 10s)   |             |             |                     |             |                |                           |            |                       |            |            |             |            |                    |             |            |             |            |                      |             |            |
| Daily Interaction     | <.01        | <.01        | -.01, .01           | 1.00        | .92            | <.01                      | <.01       | >-.01, <.01           | 1.00       | .78        | -.01        | .02        | -.04, .02          | -.02        | .47        | <b>-.03</b> | <b>.01</b> | <b>-.05, &lt;.01</b> | <b>-.03</b> | <b>.05</b> |
| Person-m interaction  | .01         | .01         | -.02, .03           | 1.01        | .53            | -.01                      | .01        | -.03, <.01            | .99        | .09        | -.03        | .03        | -.10, .03          | -.03        | .33        | -.09        | .07        | -.23, .05            | -.06        | .23        |
| Tech School Work      |             |             |                     |             |                |                           |            |                       |            |            |             |            |                    |             |            |             |            |                      |             |            |
| Daily Interaction     | .06         | .05         | -.03, .15           | 1.06        | .18            | >-.01                     | .01        | -.03, .02             | 1.00       | .71        | <b>.28</b>  | <b>.12</b> | <b>.03, .52</b>    | <b>.05</b>  | <b>.03</b> | .37         | .33        | -.28, 1.01           | .04         | .27        |
| Person-m interaction  | <b>-.24</b> | <b>.10</b>  | <b>-.44, -.04</b>   | <b>.79</b>  | <b>.02</b>     | .02                       | .05        | -.07, .11             | 1.02       | .64        | -.58        | .54        | -1.63, .47         | -.07        | .28        | .07         | .81        | -1.52, 1.65          | .01         | .93        |
| Tech Communication    |             |             |                     |             |                |                           |            |                       |            |            |             |            |                    |             |            |             |            |                      |             |            |
| Daily Interaction     | .05         | .04         | -.02, .12           | 1.06        | .12            | .01                       | .01        | -.01, .02             | 1.01       | .43        | -.09        | .09        | -.26, .08          | -.03        | .29        | -.02        | .11        | -.23, .19            | >-.01       | .86        |
| Person-m interaction  | -.16        | .11         | -.37, .05           | .85         | .14            | -.07                      | .04        | -.14, -.01            | .93        | .08        | <b>-.75</b> | <b>.33</b> | <b>-1.39, -.11</b> | <b>.13</b>  | <b>.02</b> | <b>-.90</b> | <b>.43</b> | <b>-1.74, -.05</b>   | <b>-.11</b> | <b>.04</b> |
| Tech Entertainment    |             |             |                     |             |                |                           |            |                       |            |            |             |            |                    |             |            |             |            |                      |             |            |
| Daily Interaction     | .04         | .03         | -.01, .09           | 1.05        | .08            | <b>-.01</b>               | <b>.01</b> | <b>-.61, -.05</b>     | <b>.99</b> | <b>.05</b> | -.09        | .06        | -.21, .02          | -.04        | .10        | -.10        | .07        | -.24, .04            | -.03        | .15        |
| Person-m interaction  | <b>-.22</b> | <b>.05*</b> | <b>-.32, -.11</b>   | <b>.80</b>  | <b>&lt;.01</b> | -.05                      | .03        | -.17, .02             | .95        | .13        | <b>-.60</b> | <b>.25</b> | <b>-1.08, -.11</b> | <b>-.10</b> | <b>.02</b> | <b>-.80</b> | <b>.38</b> | <b>-1.54, -.05</b>   | <b>-.10</b> | <b>.04</b> |
| Tech Creating Content |             |             |                     |             |                |                           |            |                       |            |            |             |            |                    |             |            |             |            |                      |             |            |
| Daily Interaction     | -.01        | .07         | -.14, .13           | .99         | .90            | <b>-.03</b>               | <b>.01</b> | <b>-.05, &gt;-.01</b> | <b>.97</b> | <b>.03</b> | .23         | .22        | -.21, .67          | .03         | .30        | -.39        | .27        | -.92, .14            | -.03        | .14        |
| Person-m interaction  | -.10        | .20         | -.49, .29           | .90         | .61            | .12                       | .10        | -.06, .31             | 1.13       | .21        | -.93        | .93        | -2.75, .90         | -.06        | .32        | .69         | 1.13       | -1.52, 2.90          | .03         | .54        |
| Total Screen Time     |             |             |                     |             |                |                           |            |                       |            |            |             |            |                    |             |            |             |            |                      |             |            |
| Daily Interaction     | <b>.03</b>  | <b>.01</b>  | <b>&lt;.01, .06</b> | <b>1.03</b> | <b>.05</b>     | >-.01                     | <.01       | -.01, <.01            | 1.00       | .12        | -.02        | .05        | -.10, .07          | -.01        | .72        | .02         | .06        | -.10, .13            | .01         | .76        |
| Person-m interaction  | <b>-.09</b> | <b>.03</b>  | <b>-.15, -.02</b>   | <b>.92</b>  | <b>.01</b>     | >-.01                     | .02        | -.04, .03             | 1.00       | .90        | -.25        | .17        | -.57, .08          | -.08        | .14        | -.27        | .25        | -.75, .22            | -.07        | .28        |

*Note.* Associations between each type of technology use and each mental health domain are tested in separate multilevel models alongside daily and person-level interaction terms, and covariates of daily school attendance and person-level mean school attendance, age, gender, economic disadvantage, and dummy coded race/ethnicity. Significant relations bolded. Interaction coefficients which met FDR-corrected significance level marked with an asterisk. Raw regression coefficients (standard errors) reported.

Table S4

*Multilevel Interactions between Gender and Daily Technology Use for Daily Mental Health Symptoms (Question 4)*

|                       | Conduct    |            |                 |             |            | Inattention/Hyperactivity |           |            |            |          | Depression  |            |                  |            |            | Worry    |           |             |         |          |  |
|-----------------------|------------|------------|-----------------|-------------|------------|---------------------------|-----------|------------|------------|----------|-------------|------------|------------------|------------|------------|----------|-----------|-------------|---------|----------|--|
|                       | <i>b</i>   | <i>SE</i>  | <i>CI</i>       | <i>OR</i>   | <i>p</i>   | <i>b</i>                  | <i>SE</i> | <i>CI</i>  | <i>IRR</i> | <i>p</i> | <i>b</i>    | <i>SE</i>  | <i>CI</i>        | $\beta$    | <i>p</i>   | <i>b</i> | <i>SE</i> | <i>CI</i>   | $\beta$ | <i>p</i> |  |
| Texts Sent (in 10s)   |            |            |                 |             |            |                           |           |            |            |          |             |            |                  |            |            |          |           |             |         |          |  |
| Daily Interaction     | <.01       | .02        | -.03, .03       | 1.00        | .97        | -.01                      | <.01      | -.01, <.01 | .99        | .14      | .06         | .04        | -.03, .14        | .05        | .18        | .05      | .05       | -.05, .14   | .02     | .37      |  |
| Person-m interaction  | <b>.06</b> | <b>.03</b> | <b>.01, .11</b> | <b>1.06</b> | <b>.02</b> | .02                       | .01       | >-.01, .04 | 1.02       | .06      | .07         | .10        | -.12, .27        | .04        | .45        | .09      | .13       | -.15, .34   | .03     | .46      |  |
| Tech School Work      |            |            |                 |             |            |                           |           |            |            |          |             |            |                  |            |            |          |           |             |         |          |  |
| Daily Interaction     | -.13       | .10        | -.32, .06       | .88         | .18        | <.01                      | .02       | -.04, .03  | 1.00       | .98      | .25         | .27        | -.27, .78        | .04        | .35        | -.16     | .48       | -1.09, .78  | -.02    | .74      |  |
| Person-m interaction  | .21        | .23        | -.25, .67       | 1.23        | .37        | -.03                      | .09       | -.21, .16  | .97        | .76      | .23         | 1.16       | -2.05, 2.5       | .01        | .85        | .71      | 1.48      | -2.19, 3.61 | .03     | .63      |  |
| Tech Communication    |            |            |                 |             |            |                           |           |            |            |          |             |            |                  |            |            |          |           |             |         |          |  |
| Daily Interaction     | .04        | .07        | -.11, .18       | 1.04        | .61        | -.02                      | .02       | -.05, .02  | .98        | .28      | -.05        | .30        | -.64, .54        | -.01       | .87        | -.27     | .29       | -.83, .29   | -.03    | .35      |  |
| Person-m interaction  | .42        | .23        | -.03, .87       | 1.52        | .07        | .13                       | .10       | -.07, .32  | .113       | .20      | <b>1.98</b> | <b>.97</b> | <b>.08, 3.88</b> | <b>.18</b> | <b>.04</b> | 1.40     | 1.13      | -.81, 3.60  | .09     | .22      |  |
| Tech Entertainment    |            |            |                 |             |            |                           |           |            |            |          |             |            |                  |            |            |          |           |             |         |          |  |
| Daily Interaction     | <b>.17</b> | <b>.08</b> | <b>.01, .33</b> | <b>1.19</b> | <b>.04</b> | .01                       | .02       | -.03, .05  | 1.01       | .68      | .21         | .20        | -.19, .60        | .04        | .30        | .08      | .31       | -.53, .69   | .01     | .80      |  |
| Person-m interaction  | .13        | .20        | -.25, .52       | 1.14        | .50        | .09                       | .09       | -.09, .27  | 1.09       | .31      | .07         | .70        | -1.31, 1.45      | .01        | .92        | -.04     | 1.09      | -2.17, 2.09 | >-.01   | .97      |  |
| Tech Creating Content |            |            |                 |             |            |                           |           |            |            |          |             |            |                  |            |            |          |           |             |         |          |  |
| Daily Interaction     | .05        | .13        | -.20, .29       | 1.05        | .70        | .02                       | .04       | -.05, .09  | 1.02       | .58      | .41         | .60        | -.77, 1.59       | .03        | .50        | -.61     | .65       | -1.87, .65  | -.03    | .35      |  |
| Person-m interaction  | .59        | .47        | -.33, 1.51      | 1.80        | .21        | .29                       | .21       | -.13, .70  | 1.33       | .17      | 3.09        | 2.13       | -1.09, 7.26      | .11        | .15        | 1.13     | 2.44      | -3.66, 5.91 | .03     | .65      |  |
| Total Screen Time     |            |            |                 |             |            |                           |           |            |            |          |             |            |                  |            |            |          |           |             |         |          |  |
| Daily Interaction     | .03        | .03        | -.02, .09       | 1.03        | .25        | <.01                      | <.01      | -.02, .02  | 1.00       | .99      | .14         | .11        | -.08, .36        | .06        | .20        | -.01     | .15       | -.29, .28   | >-.01   | .97      |  |
| Person-m interaction  | .13        | .08        | -.04, .29       | 1.14        | .12        | .05                       | .04       | -.03, .14  | 1.05       | .21      | .56         | .40        | -.24, 1.35       | .11        | .17        | .46      | .51       | -.53, 1.45  | .07     | .36      |  |

*Note.* Associations between each type of technology use and each mental health domain are tested in separate multilevel models alongside daily and person-level interaction terms, and covariates of daily school attendance and person-level mean school attendance, age, gender, economic disadvantage, and dummy coded race/ethnicity. Significant relations bolded. Interaction coefficients which met FDR-corrected significance level marked with an asterisk. Raw regression coefficients (standard errors) reported.

Table S5

*Multilevel Interactions between Economic Disadvantage and Daily Technology Use for Daily Mental Health Symptoms (Question 4)*

|                       | Conduct  |           |            |           |          | Inattention/Hyperactivity |            |                  |            |            | Depression |           |             |         |          | Worry    |           |             |         |          |
|-----------------------|----------|-----------|------------|-----------|----------|---------------------------|------------|------------------|------------|------------|------------|-----------|-------------|---------|----------|----------|-----------|-------------|---------|----------|
|                       | <i>b</i> | <i>SE</i> | <i>CI</i>  | <i>OR</i> | <i>p</i> | <i>b</i>                  | <i>SE</i>  | <i>CI</i>        | <i>IRR</i> | <i>p</i>   | <i>b</i>   | <i>SE</i> | <i>CI</i>   | $\beta$ | <i>p</i> | <i>b</i> | <i>SE</i> | <i>CI</i>   | $\beta$ | <i>p</i> |
| Texts Sent (in 10s)   |          |           |            |           |          |                           |            |                  |            |            |            |           |             |         |          |          |           |             |         |          |
| Daily Interaction     | -.01     | .02       | -.05, .02  | .99       | .40      | -.01                      | <.01       | -.02, <.01       | .99        | .17        | -.04       | .03       | -.10, .03   | -.06    | .29      | -.01     | .03       | -.07, .05   | -.01    | .78      |
| Person-m interaction  | -.03     | .02       | -.07, .02  | .98       | .25      | -.01                      | .01        | -.03, .02        | .99        | .56        | .02        | .05       | -.09, .13   | .02     | .72      | -.15     | .09       | -.33, .03   | -.13    | .10      |
| Tech School Work      |          |           |            |           |          |                           |            |                  |            |            |            |           |             |         |          |          |           |             |         |          |
| Daily Interaction     | .04      | .10       | -.15, .23  | 1.04      | .70      | -.02                      | .02        | -.06, .02        | .98        | .43        | .11        | .27       | -.42, .64   | .01     | .68      | -.43     | .45       | -1.31, .45  | -.03    | .34      |
| Person-m interaction  | -.29     | .29       | -.85, .28  | .75       | .32      | -.11                      | .12        | -.34, .12        | .89        | .34        | -.11       | 1.33      | -2.71, 2.50 | -.01    | .94      | -1.38    | 1.67      | -4.65, 1.90 | -.08    | .41      |
| Tech Communication    |          |           |            |           |          |                           |            |                  |            |            |            |           |             |         |          |          |           |             |         |          |
| Daily Interaction     | -.02     | .10       | -.22, .18  | .98       | .84      | -.01                      | .02        | -.05, .04        | 1.00       | .79        | .02        | .21       | -.38, .42   | <.01    | .91      | -.16     | .28       | -.71, .39   | -.02    | .56      |
| Person-m interaction  | .09      | .23       | -.36, .55  | 1.10      | .69      | .07                       | .11        | -.15, .29        | 1.07       | .53        | .93        | .89       | -.81, 2.66  | .09     | .29      | .25      | 1.07      | -1.84, 2.33 | .02     | .82      |
| Tech Entertainment    |          |           |            |           |          |                           |            |                  |            |            |            |           |             |         |          |          |           |             |         |          |
| Daily Interaction     | .08      | .06       | -.05, .20  | 1.08      | .23      | .01                       | .02        | -.03, .05        | 1.01       | .65        | -.18       | .18       | -.54, .17   | -.04    | .31      | -.24     | .26       | -.75, .26   | -.03    | .35      |
| Person-m interaction  | -.16     | .19       | -.52, .21  | .85       | .40      | -.03                      | .08        | -.19, .13        | .97        | .72        | .10        | .74       | -1.36, 1.55 | .01     | .90      | -1.48    | 1.03      | -3.51, .55  | -.10    | .15      |
| Tech Creating Content |          |           |            |           |          |                           |            |                  |            |            |            |           |             |         |          |          |           |             |         |          |
| Daily Interaction     | -.10     | .14       | -.37, .18  | .91       | .50      | <b>-.10</b>               | <b>.04</b> | <b>-.18, .02</b> | <b>.90</b> | <b>.01</b> | .17        | .59       | -.98, 1.31  | .02     | .78      | -.42     | .63       | -1.66, .81  | -.02    | .50      |
| Person-m interaction  | -.25     | .49       | -1.20, .71 | .78       | .61      | .17                       | .23        | -.28, .62        | 1.18       | .46        | 1.27       | 2.56      | -3.73, 6.28 | .05     | .62      | 1.06     | 2.35      | -3.54, 5.65 | .03     | .65      |
| Total Screen Time     |          |           |            |           |          |                           |            |                  |            |            |            |           |             |         |          |          |           |             |         |          |
| Daily Interaction     | .02      | .03       | -.05, .09  | 1.02      | .56      | >-.01                     | .01        | -.02, .02        | 1.00       | .83        | <.01       | .12       | -.24, .24   | <.01    | .99      | -.15     | .16       | -.46, .16   | -.04    | .34      |
| Person-m interaction  | -.07     | .09       | -.24, .11  | .94       | .46      | -.01                      | .04        | -.10, .07        | .99        | .75        | .08        | .40       | -.71, .86   | .02     | .85      | -.48     | .52       | -1.50, .53  | -.08    | .35      |

*Note.* Associations between each type of technology use and each mental health domain are tested in separate multilevel models alongside daily and person-level interaction terms, and covariates of daily school attendance and person-level mean school attendance, age, gender, economic disadvantage, and dummy coded race/ethnicity. Significant relations bolded. Interaction coefficients which met FDR-corrected significance level marked with an asterisk. Raw regression coefficients (standard errors) reported.

Table S6

*Multilevel Interactions between T1 Mental Health Risk and Daily Technology Use for Daily Mental Health Symptoms (Question 4)*

|                       | Conduct     |            |                   |            |                 | Inattention/Hyperactivity |            |                 |             |            | Depression  |            |                   |             |                | Worry        |             |                    |             |            |  |
|-----------------------|-------------|------------|-------------------|------------|-----------------|---------------------------|------------|-----------------|-------------|------------|-------------|------------|-------------------|-------------|----------------|--------------|-------------|--------------------|-------------|------------|--|
|                       | <i>b</i>    | <i>SE</i>  | <i>CI</i>         | <i>OR</i>  | <i>p</i>        | <i>b</i>                  | <i>SE</i>  | <i>CI</i>       | <i>IRR</i>  | <i>p</i>   | <i>b</i>    | <i>SE</i>  | <i>CI</i>         | $\beta$     | <i>p</i>       | <i>b</i>     | <i>SE</i>   | <i>CI</i>          | $\beta$     | <i>p</i>   |  |
| Texts Sent (in 10s)   |             |            |                   |            |                 |                           |            |                 |             |            |             |            |                   |             |                |              |             |                    |             |            |  |
| Daily Interaction     | >-.01       | .01        | -.01, .01         | 1.00       | .43             | <.01                      | <.01       | -.01, .01       | 1.00        | .57        | >-.01       | .03        | -.06, .06         | >-.01       | .90            | -.05         | .07         | -.19, .09          | -.02        | .46        |  |
| Person-m interaction  | .02         | .02        | -.01, .05         | 1.02       | .26             | .01                       | .01        | >-.01, .03      | 1.01        | .12        | -.13        | .08        | -.28, .02         | -.05        | .08            | <.01         | .16         | -.32, .32          | <.01        | .99        |  |
| Tech School Work      |             |            |                   |            |                 |                           |            |                 |             |            |             |            |                   |             |                |              |             |                    |             |            |  |
| Daily Interaction     | -.03        | .10        | -.22, .15         | .97        | .73             | <.01                      | .02        | -.04, .04       | 1.00        | .98        | -.33        | .27        | -.86, .19         | -.03        | .21            | <b>-1.02</b> | <b>.52</b>  | <b>-2.04, -.01</b> | <b>-.06</b> | <b>.05</b> |  |
| Person-m interaction  | -.13        | .23        | -.59, .32         | .88        | .57             | -.11                      | .09        | -.28, .07       | .90         | .24        | -.22        | 1.15       | -2.47, 2.03       | -.02        | .85            | 1.38         | 1.57        | -1.70, 4.45        | .07         | .38        |  |
| Tech Communication    |             |            |                   |            |                 |                           |            |                 |             |            |             |            |                   |             |                |              |             |                    |             |            |  |
| Daily Interaction     | -.03        | .09        | -.20, .15         | .98        | .78             | -.10                      | .02        | -.04, .03       | .99         | .71        | .23         | .28        | -.32, .78         | .03         | .42            | -.17         | .33         | -.80, .47          | -.02        | .61        |  |
| Person-m interaction  | -.27        | .22        | -.70, .17         | .77        | .23             | <b>.18</b>                | <b>.09</b> | <b>.01, .36</b> | <b>1.20</b> | <b>.04</b> | .37         | 1.16       | -1.90, 2.64       | .03         | .75            | .20          | 1.33        | -2.41, 2.81        | .01         | .88        |  |
| Tech Entertainment    |             |            |                   |            |                 |                           |            |                 |             |            |             |            |                   |             |                |              |             |                    |             |            |  |
| Daily Interaction     | <b>.25</b>  | <b>.08</b> | .10, .40          | 1.28       | <b>&lt;.01</b>  | <.01                      | .02        | -.03, .04       | 1.00        | .85        | <b>-.58</b> | <b>.19</b> | <b>-.94, -.21</b> | <b>-.10</b> | <b>&lt;.01</b> | -.27         | .28         | -.84, .30          | -.03        | .35        |  |
| Person-m interaction  | <b>-.57</b> | <b>.13</b> | <b>-.82, -.32</b> | <b>.57</b> | <b>&lt;.01*</b> | .04                       | .09        | .13, .21        | 1.04        | .65        | 1.03        | .93        | -.78, 2.85        | .08         | .27            | -.26         | 1.29        | -2.78, 2.26        | -.09        | .84        |  |
| Tech Creating Content |             |            |                   |            |                 |                           |            |                 |             |            |             |            |                   |             |                |              |             |                    |             |            |  |
| Daily Interaction     | .02         | .14        | -.25, .28         | 1.02       | .91             | -.05                      | .04        | -.13, .03       | .95         | .25        | -.65        | .79        | -2.19, .90        | -.04        | .41            | -.76         | 1.42        | -3.55, 2.03        | -.03        | .59        |  |
| Person-m interaction  | -.55        | .44        | -1.41, .31        | .58        | .21             | <b>.49</b>                | <b>.21</b> | <b>.09, .90</b> | <b>1.63</b> | <b>.02</b> | 2.57        | 2.87       | -3.05, 8.19       | .09         | .37            | <b>5.18</b>  | <b>2.62</b> | <b>.04, 10.32</b>  | <b>.14</b>  | <b>.05</b> |  |
| Total Screen Time     |             |            |                   |            |                 |                           |            |                 |             |            |             |            |                   |             |                |              |             |                    |             |            |  |
| Daily Interaction     | .02         | .03        | -.04, .09         | 1.02       | .43             | -.01                      | .01        | -.03, .02       | .99         | .63        | -.20        | .11        | -.41, .02         | -.07        | .08            | -.31         | .18         | -.66, .05          | -.07        | .09        |  |
| Person-m interaction  | -.15        | .08        | .31, .02          | .87        | .08             | .05                       | .04        | -.03, .13       | 1.05        | .19        | .49         | .44        | -.37, 1.35        | .09         | .27            | .56          | .51         | -.44, 1.55         | .08         | .27        |  |

*Note.* Associations between each type of technology use and each mental health domain are tested in separate multilevel models alongside daily and person-level interaction terms, and covariates of daily school attendance and person-level mean school attendance, age, gender, economic disadvantage, and dummy coded race/ethnicity. Significant relations bolded. Interaction coefficients which met FDR-corrected significance level marked with an asterisk. Raw regression coefficients (standard errors) reported.

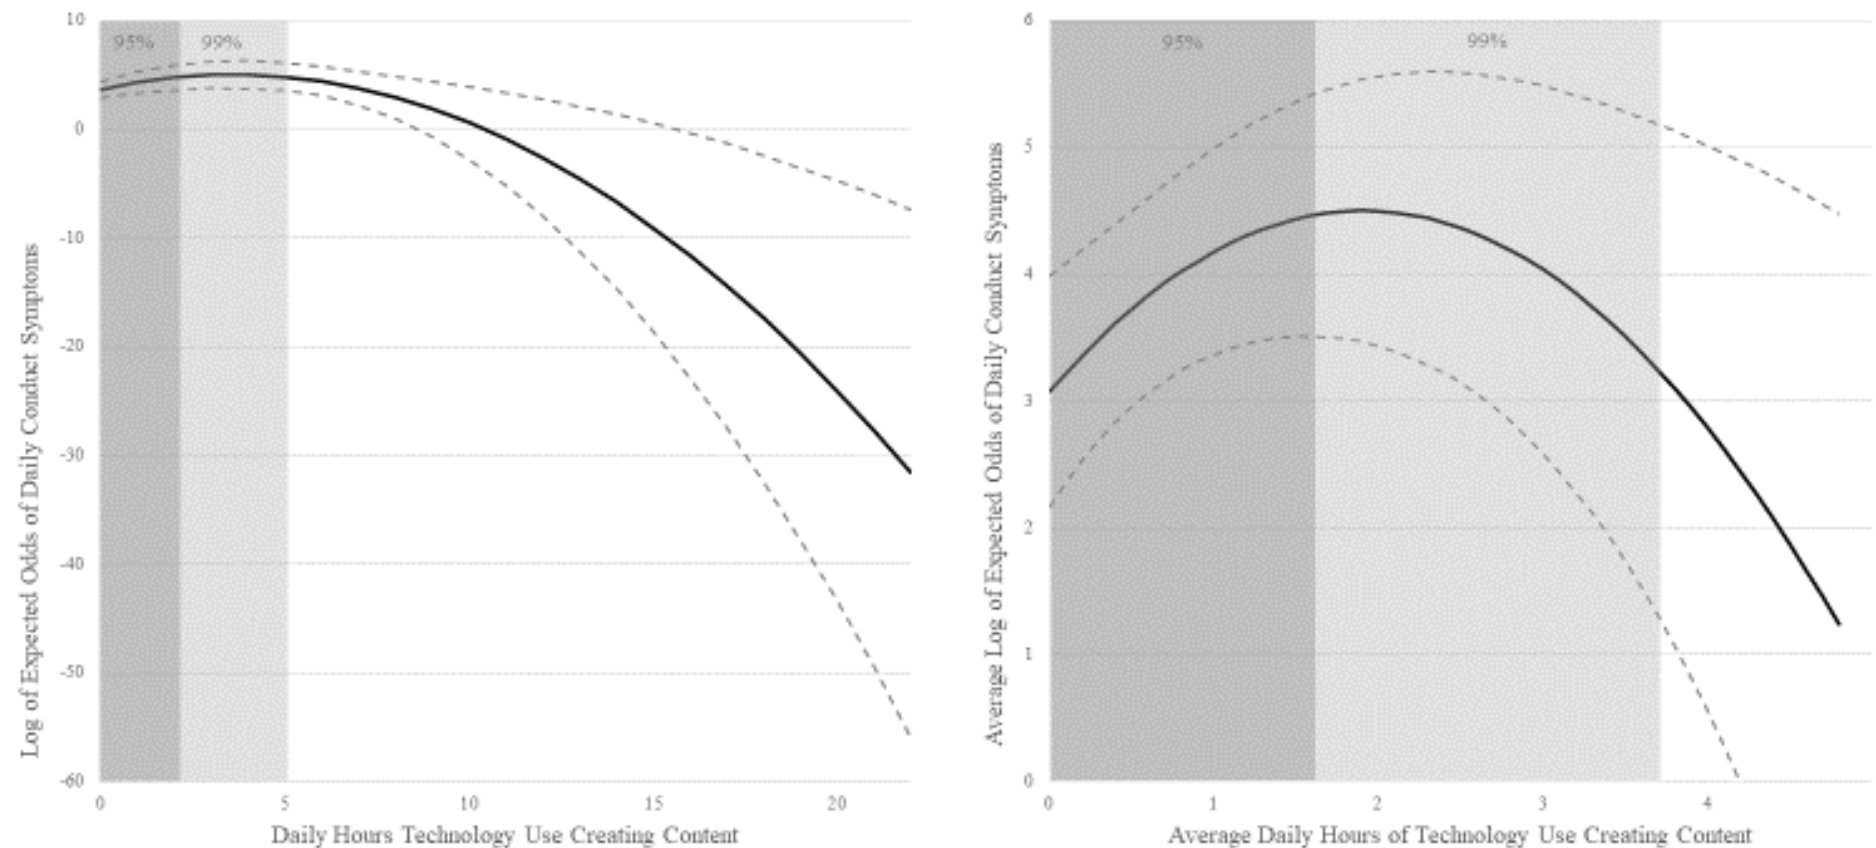

*Figure S1.* Quadratic Associations- Time spent on Technology Creating Content and Daily Conduct Problem Symptoms. Left panel depicts within-person daily quadratic association of daily technology use creating content (X axis) and the log of the expected odds of experiencing a daily conduct problem symptom (Y axis). Right panel depicts between-person average quadratic associations between technology use creating content (X axis) and the average log of expected odds of experiencing a daily conduct problem symptom (Y axis). *Dashed lines* represent the 95% confidence interval. The full ranges of reported hours of technology use creating content are depicted; *grey shading* reflects the 95<sup>th</sup> and 99<sup>th</sup> percentiles for technology use creating content.



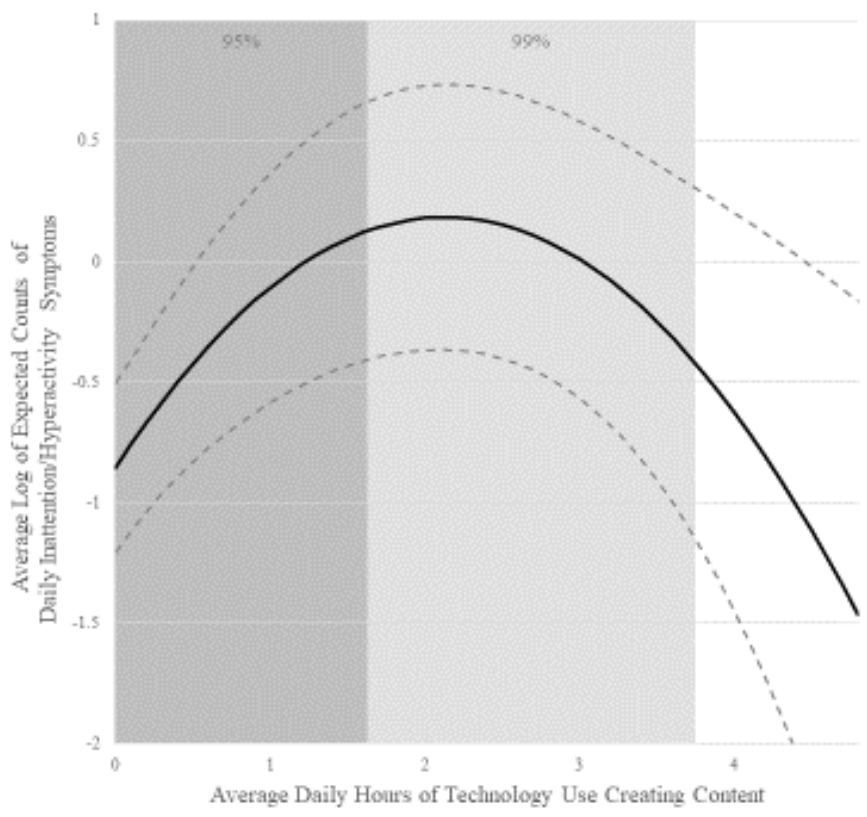

Figure S2. Quadratic Associations- Time spent on Technology Creating Content and Daily Inattention/Hyperactivity Symptoms. Figure depicts between-person average quadratic associations between technology use creating content (X axis) and the average log of expected counts of daily inattention/hyperactivity symptoms (Y axis). Dashed lines represent the 95% confidence interval. The full ranges of reported hours of technology use creating content are depicted; grey shading reflects the 95<sup>th</sup> and 99<sup>th</sup> percentiles for technology use creating content.

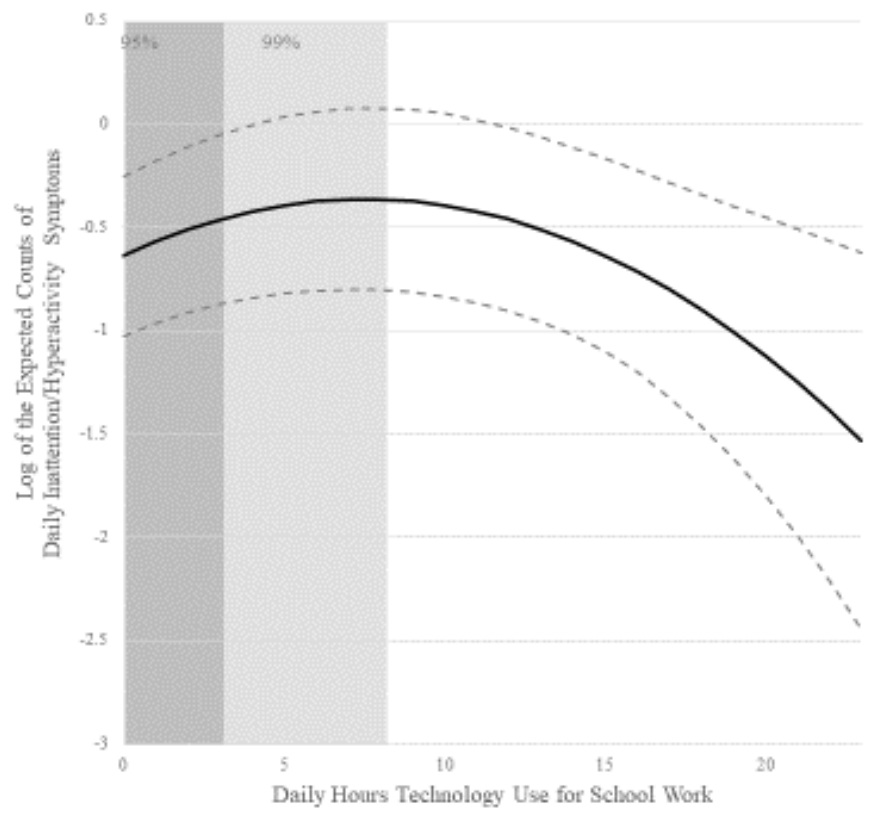

Figure S3. Quadratic Associations- Time spent on Technology for School Work and Daily Depressive Symptoms. Left panel depicts within-person daily quadratic association of daily technology use creating content (X axis) and the log of the expected odds of experiencing a daily conduct problem symptom (Y axis). Right panel depicts between-person average quadratic associations between technology use creating content (X axis) and the average log of expected odds of experiencing a daily conduct problem symptom (Y axis). Dashed lines represent the 95% confidence interval. The full ranges of reported hours of technology use creating content are depicted; grey shading reflects the 95<sup>th</sup> and 99<sup>th</sup> percentiles for technology use creating content.
